# Supplementary material for: Adverse effects of maternal exposure to bisphenol F on the anxiety- and depression-like behavior of offspring
Source: PubMed Central journal article supplement — J Vet Med Sci. 2016 Dec 25;79(2):432–9. doi: 10.1292/jvms.16-0502 (PMC5326953; doi:10.1292/jvms.16-0502), 2016-12-25
Supplement: jvms-79-432-s001.pdf [file jvms-79-432-s001.pdf]

**Supplemental Figure 1.** Effects of BPA or BPF exposure in late pregnancy on anxiety-like behavior of offspring in the OFT.

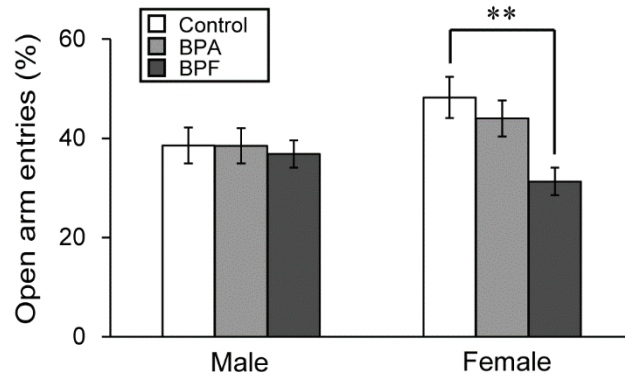

Supplemental figure 1

The parameter is the percentage of open arm entries in total entries (mean  $\pm$  SE). \* $P < 0.05$  compared controls with BPF group.

**Supplemental Figure 2.** Body weight of offspring (mean  $\pm$  SE).

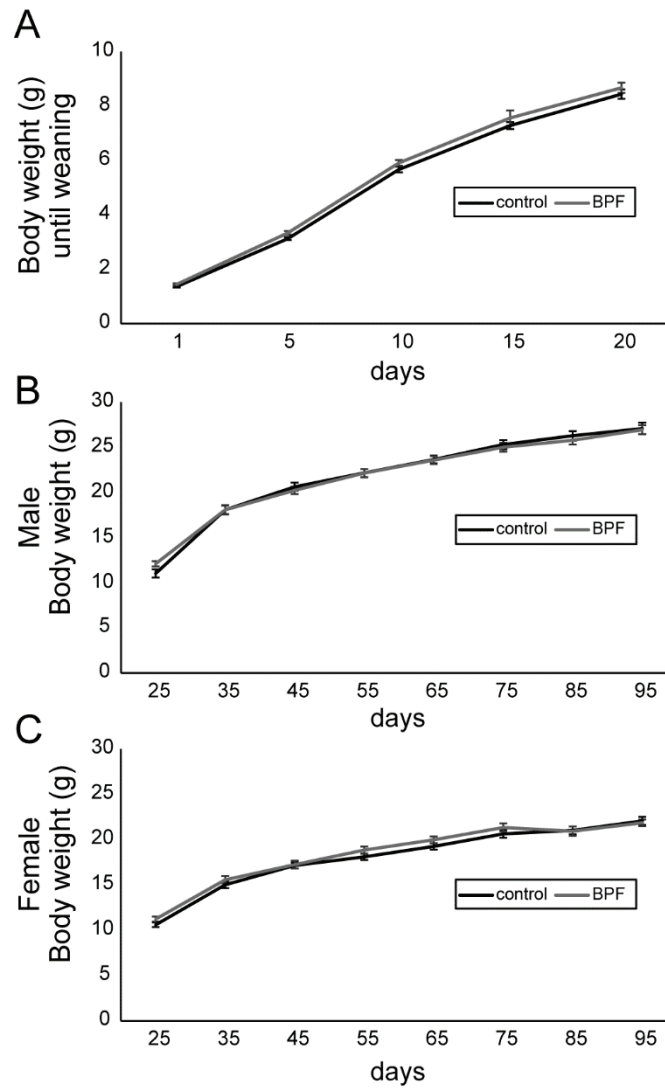

**Supplemental figure 2**

Body weight was recorded regardless of sex until weaning, after which body weight was recorded for males and females separately. (A) Body weight of all offspring from PD 1 to PD 20. (B) Body weight of male offspring from PD 25 to PD 95. (C) Body weight of female offspring from PD 25 to PD 95.

**Supplemental Table 1.** The effects of BPA and BPF on the number of offspring and sex ratio

(male to female).

|                | <b>Number</b> | <b>Sex ratio</b> |
|----------------|---------------|------------------|
| <b>Control</b> | 7.17±0.79     | 1.38±0.54        |
| <b>BPA</b>     | 7.50±0.34     | 1.37±0.37        |
| <b>BPF</b>     | 8.50±0.67     | 1.09±0.19        |

Data are mean ± SE.
